# Supplementary material for: Expression of Carbonic Anhydrase III, a Nucleus Pulposus Phenotypic Marker, is Hypoxia-responsive and Confers Protection from Oxidative Stress-induced Cell Death
Source: PubMed Central journal article supplement (PMC5861082; doi:10.1038/s41598-018-23196-7), 2018-03-20
Supplement: 41598_2018_23196_MOESM1_ESM.pdf [file 41598_2018_23196_MOESM1_ESM.pdf]

## **Supplementary Information**

Expression of Carbonic Anhydrase III, a Nucleus Pulposus Phenotypic Marker, is Hypoxia-responsive and Confers Protection from Oxidative Stress-induced Cell Death

**Elizabeth S. Silagi<sup>1</sup>, Philip Batista<sup>2</sup>, Irving M. Shapiro<sup>1,2</sup>, Makarand V. Risbud<sup>1,2</sup>**

Supplementary Figure S1-1. Examples of Uncropped Western Blots

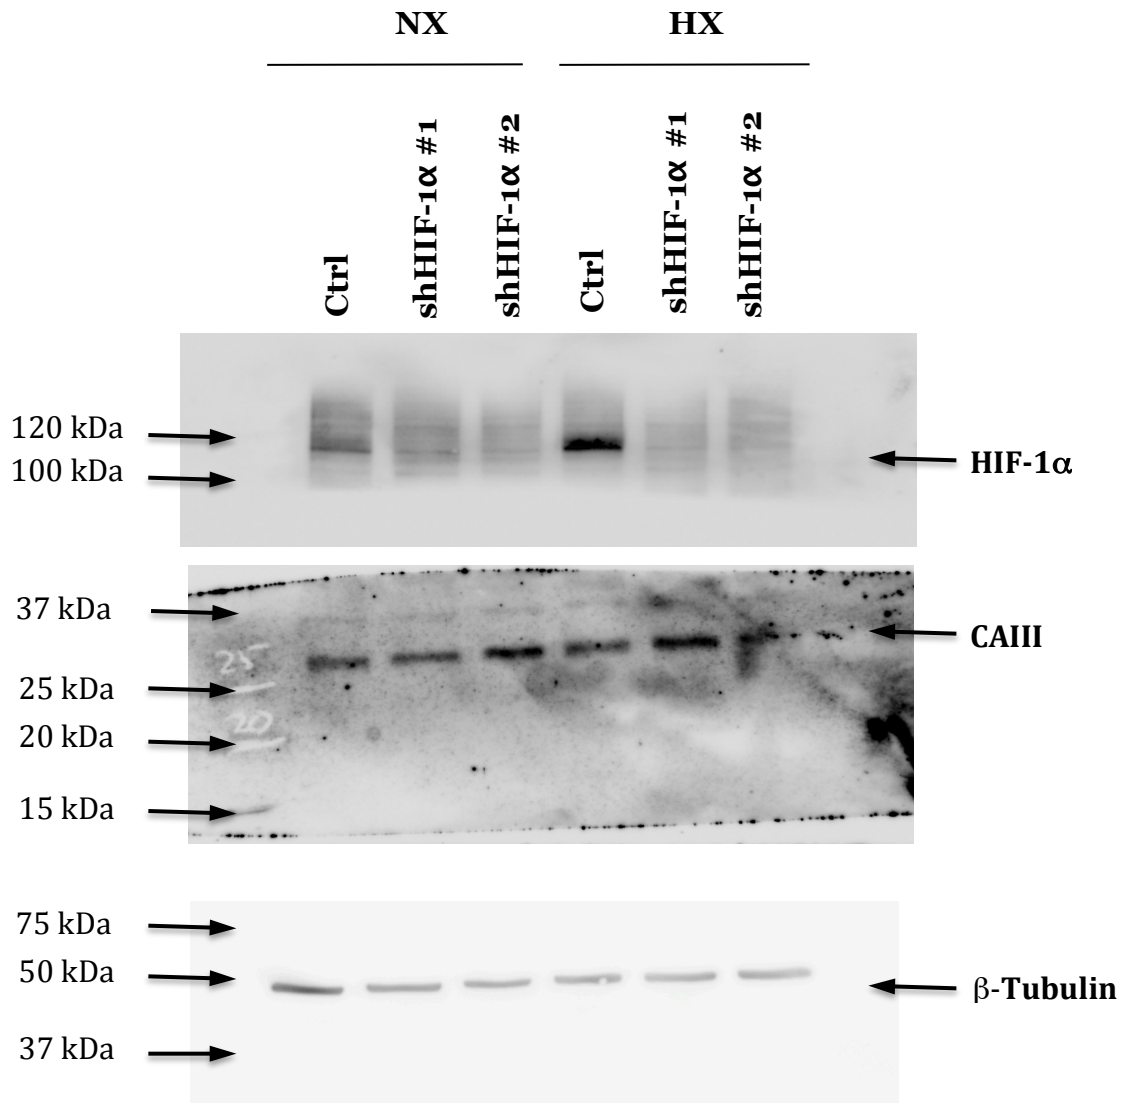

Examples of Uncropped Western Blots for HIF-1α, CAIII, and β-Tubulin from Figure 2a.

Supplementary Figure S1-2. Examples of Uncropped Western Blots

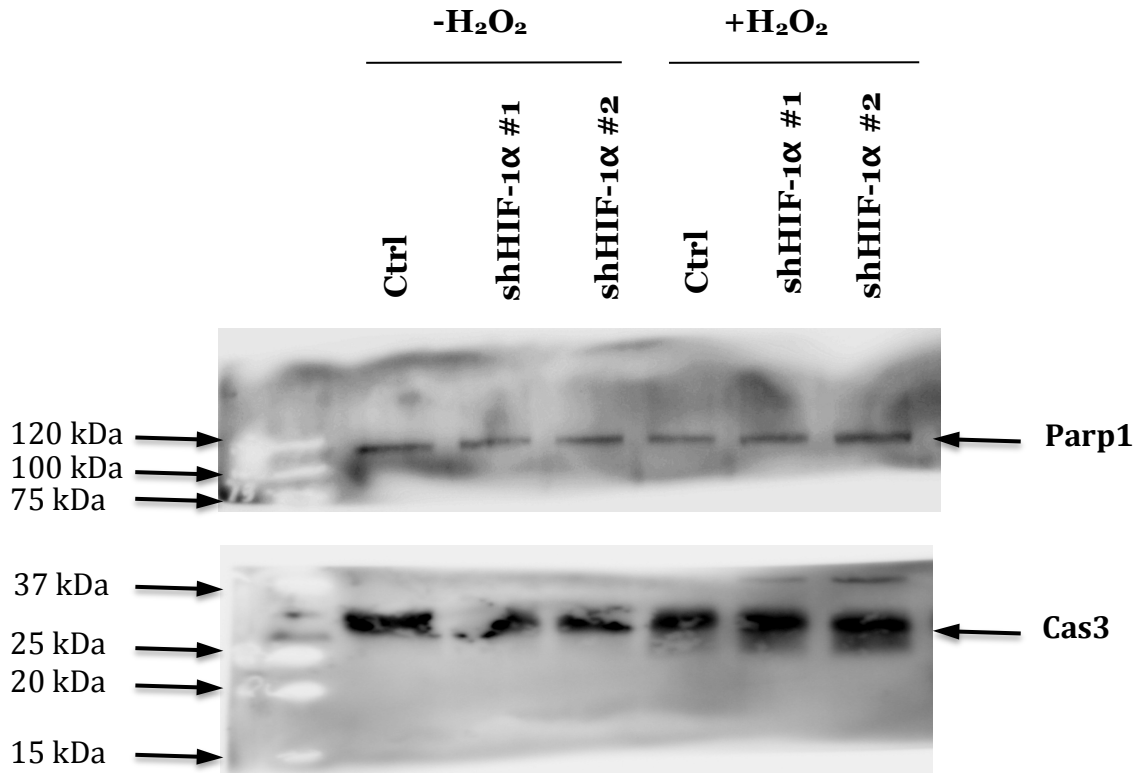

Examples of Uncropped Western Blots for Parp1 and Cas3 from Figure 5i.

Supplementary Table S1: Primer sequences used for Chromatin Immunoprecipitations

| Gene Name | Primer Location |       | Primer Sequence            |                            |
|-----------|-----------------|-------|----------------------------|----------------------------|
|           | Start           | End   | Forward                    | Reverse                    |
| Car3 R1   | -63             | -150  | 5'-agtgatccctggtcacaaaa-3' | 5'-cggctaagtatgtggaatgg-3' |
| Car3 R2   | -870            | -1011 | 5'-gtcccagattcctcctcatc-3' | 5'-cagtctctggacgcttgagt-3' |
